# Supplementary material
Source: PubMed Central journal article supplement (PMC438981)

**A**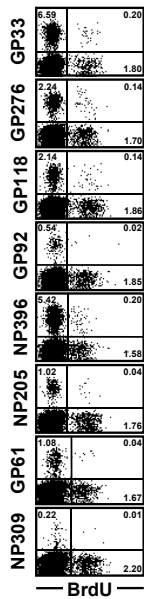**B**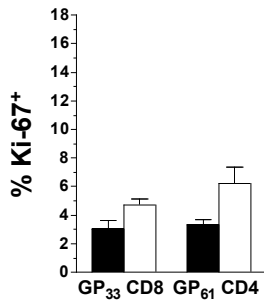

Supplement: pnas_101_25_9357__2.pdf [file pnas_101_25_9357__2.pdf]

**A**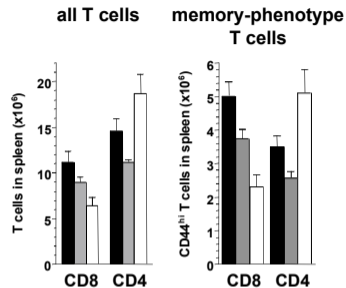**B**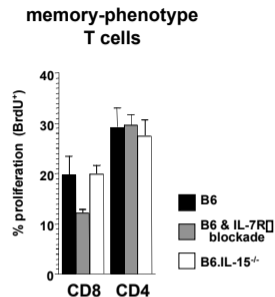**C**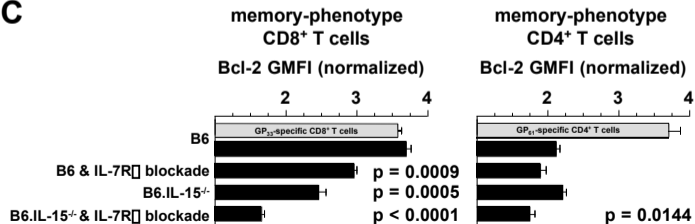

Supplement: pnas_101_25_9357__3.pdf [file pnas_101_25_9357__3.pdf]
